# Supplementary material for: Grip Strength as a Surrogate Measure of Strength, Functional, and Metabolic Parameter Increases in Breast Cancer Survivors Undergoing an Exercise Regimen
Source: Research Square preprint supplement (doi:10.21203/rs.3.rs-5822657/v1), 2025-04-29
Supplement: Supplementary file 1 [file 6dfada8805be1117b2dd8395.docx]

**Supplemental Table 1**: Pre- and post-regimen metabolic and anthropometric parameters.

|  | Pre-regimen  (median, IQR) | Post-regimen  (median, IQR) | Paired p value |
| --- | --- | --- | --- |
| Body Mass Index, kg/m2 | 27.8 (24.4-33.1) | 27.5 (24.1-32.6) | **<0.001** |
| Inbody Bodyfat, % | 38.4 (33.5-43.3) | 36.2 (31.0-42.0) | **<0.001** |
| Inbody Muscle Mass, % | 33.6 (30.8-36.5) | 35.0 (31.6-37.6) | **<0.001** |
| Bone Mineral Content, g/cm | 6.1 (5.6-6.6) | 6.1 (5.6-6.7) | 0.918 |
| Whole body phase angle, degrees | 5.0 (4.6-5.2) | 5.2 (4.8-5.5) | **<0.001** |
| Resting metabolic rate, cal/day | 1370 (1268.3-1449) | 1383.5 (1296.3-1460) | **<0.001** |

**Supplemental Table 2**: Pre- and post-regimen quality of life assessment via Godin Leisure-Time Exercise and Euro-QoL Group EQ-5D Questionnaires.

|  | Pre-regimen  (median, IQR) | Post-regimen  (median, IQR) | Paired p value |
| --- | --- | --- | --- |
| Godin Score | 22 (11-40) | 44.5 (37-57.75) | **0.001** |
| EQ5D 1 | 5 (5-5) | 5 (5-5) | N/A |
| EQ5D 2 | 5 (5-5) | 5 (5-5) | N/A |
| EQ5D 3 | 5 (5-5) | 5 (5-5) | N/A |
| EQ5D 4 | 4 (4-5) | 4 (4-5) | N/A |
| EQ5D 5 | 5 (4-5) | 5 (4-5) | N/A |
| EQ5D 6 | 70 (60-80) | 85 (72.75-90) | **0.003** |
